# Supplementary material
Source: PubMed Central journal article supplement (PMC4524148)
Supplement: AEM.00194-15_zam999116314so1.pdf [file AEM.00194-15_zam999116314so1.pdf]

1 **SUPPLEMENTAL FIGURES AND TABLES**

2 **FIG S1** SDS- PAGE (8% acrylamide) of EPS stained with Coomassie Brilliant Blue R-250 (left) and silver-  
3 stained SDS-PAGE (8% acrylamide) of EPS (right).

4 **FIG S2** GC/MS chromatogram performed on EPS sample isolated from *Psa* NZ V-13.

5 **FIG S3**  $^1\text{H}$ -NMR spectrum of the EPS dissolved in  $\text{D}_2\text{O}$  recorded at  $60^\circ\text{C}$  (500MHz). Insert shows expanded  
6 plot of anomeric region. Letters refer to sugar residues shown in Fig. 5.

7 **FIG S4**  $^{13}\text{C}$  -NMR spectrum of the EPS dissolved in  $\text{D}_2\text{O}$  recorded at  $60^\circ\text{C}$  (500MHz). Inserts show expanded  
8 plot of anomeric region (left) and  $\text{CH}_3$  of C-6 of deoxysugars (right). Letters refer to sugar residues shown in  
9 Fig. 5.

10 **FIG S5** HSQC spectrum of the *Psa* NZ V-13 - EPS dissolved in  $\text{D}_2\text{O}$  recorded at  $60^\circ\text{C}$  (500MHz).

11 **FIG S6**  $^1\text{H}$ - $^{13}\text{C}$ -HSQC spectrum of the ring sugar (A) and anomeric (B) regions of the *Psa* NZ V-13- EPS  
12 dissolved in  $\text{D}_2\text{O}$  recorded at  $60^\circ\text{C}$  (500MHz). Letters refer to sugar residues shown in Fig. 5 and numbers to  
13 carbons in sugar rings.

14 **FIG S7**  $^1\text{H}$ - $^1\text{H}$  COSY NMR spectrum of the *Psa* NZ V-13 -EPS dissolved in  $\text{D}_2\text{O}$  recorded at  $60^\circ\text{C}$  (500MHz).

15 **FIG S8**  $^1\text{H}$ - $^1\text{H}$  COSY spectrum of the *Psa* NZ V-13 -EPS dissolved in  $\text{D}_2\text{O}$  recorded at  $60^\circ\text{C}$  (500MHz). Letters  
16 refer to sugar residues shown in Fig. 5 and numbers to proton cross-peaks in the sugar rings.

17

18

19

20

21

22

23

24

25

26

27

28

29

30  
31  
32  
33  
34  
35  
36  
37  
38  
39  
40  
41  
42  
43  
44  
45  
46  
47  
48  
49  
50  
51  
52  
53  
54  
55

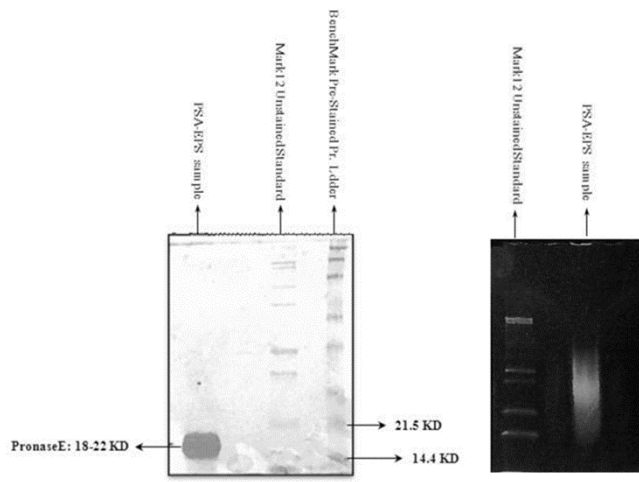

Fig. S1

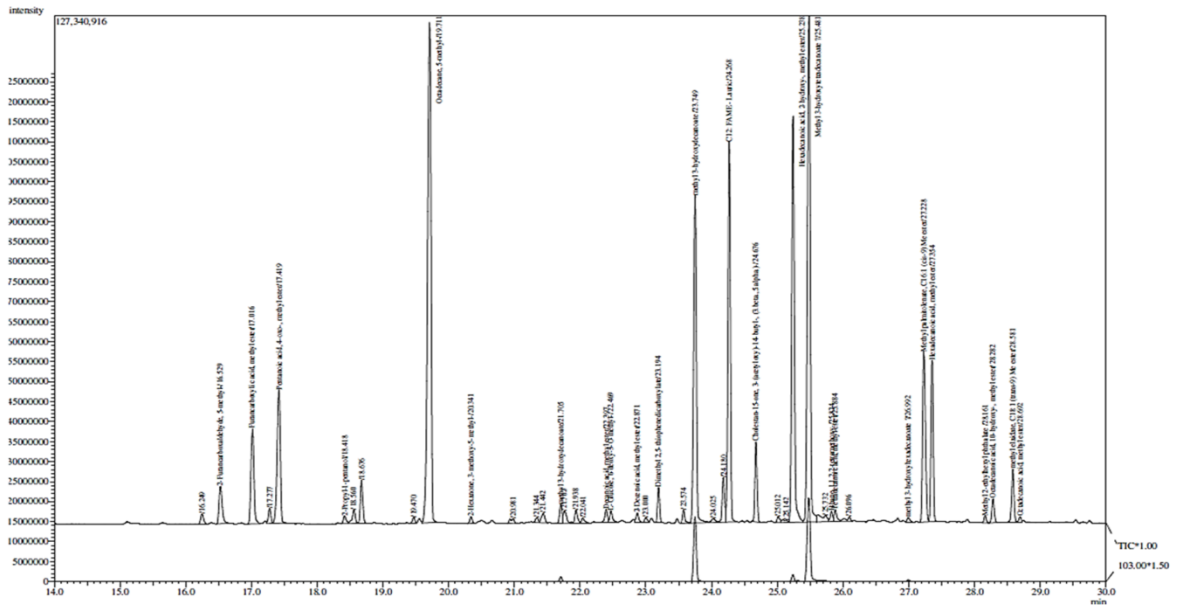

Continued

GCMS Peak Report TIC

| Peak# | R.Time | Area      | Name                                                           | Area% |
|-------|--------|-----------|----------------------------------------------------------------|-------|
| 1     | 7.034  | 32442842  | Ethane, 1,1,2-trimethoxy-                                      | 1.29  |
| 2     | 7.640  | 3209375   | Ethane, 1,1,2-trimethoxy-                                      | 0.13  |
| 3     | 8.900  | 5181291   | 2-Furancarboxaldehyde                                          | 0.21  |
| 4     | 10.384 | 5449126   | Ethylbenzene                                                   | 0.22  |
| 5     | 10.525 | 40505528  | Sulfuric acid, dimethyl ester                                  | 1.61  |
| 6     | 10.861 | 21779483  | Benzene, 1,2-dimethyl-                                         | 0.86  |
| 7     | 12.285 | 7919916   | Benzene, 1,2-dimethyl-                                         | 0.31  |
| 8     | 16.249 | 7503712   |                                                                | 0.30  |
| 9     | 16.529 | 30717337  | 2-Furancarboxaldehyde, 5-methyl-                               | 1.22  |
| 10    | 17.016 | 72795021  | Furancarboxylic acid, methyl ester                             | 2.89  |
| 11    | 17.277 | 9684831   |                                                                | 0.38  |
| 12    | 17.419 | 113833982 | Pentanoic acid, 4-oxo-, methyl ester                           | 4.52  |
| 13    | 18.418 | 5780403   | 2-Propyl-1-pentanol                                            | 0.23  |
| 14    | 18.560 | 10574206  |                                                                | 0.42  |
| 15    | 18.676 | 26796056  |                                                                | 1.06  |
| 16    | 19.470 | 3981213   |                                                                | 0.16  |
| 17    | 19.711 | 461618225 | Octadecane, 5-methyl-                                          | 18.32 |
| 18    | 20.341 | 4166092   | 2-Hexanone, 3-methoxy-5-methyl-                                | 0.17  |
| 19    | 20.981 | 4755279   |                                                                | 0.19  |
| 20    | 21.344 | 3637879   |                                                                | 0.14  |
| 21    | 21.442 | 8387363   |                                                                | 0.33  |
| 22    | 21.705 | 11584631  | methyl 3-hydroxydecanoate                                      | 0.46  |
| 23    | 21.762 | 10272315  |                                                                | 0.41  |
| 24    | 21.938 | 9611419   |                                                                | 0.38  |
| 25    | 22.041 | 3787038   |                                                                | 0.15  |
| 26    | 22.397 | 8675618   | Decanoic acid, methyl ester                                    | 0.34  |
| 27    | 22.469 | 8277321   | L-Glucose, 6-deoxy-3-O-methyl-                                 | 0.33  |
| 28    | 22.871 | 6593497   | 2-Decenoic acid, methyl ester                                  | 0.26  |
| 29    | 23.000 | 3699611   |                                                                | 0.15  |
| 30    | 23.194 | 19839738  | Dimethyl 2,5-thiophene dicarboxylate                           | 0.79  |
| 31    | 23.574 | 8286898   |                                                                | 0.33  |
| 32    | 23.749 | 229704737 | methyl 3-hydroxydecanoate                                      | 9.11  |
| 33    | 24.025 | 4507784   |                                                                | 0.18  |
| 34    | 24.180 | 30517822  |                                                                | 1.21  |
| 35    | 24.268 | 239095717 | C12: FAME - Lauric                                             | 9.49  |
| 36    | 24.676 | 44699399  | Cholestan-15-one, 3-(acetyloxy)-14-butyl-, (3.beta.,5.alpha.)- | 1.77  |
| 37    | 25.012 | 4587064   |                                                                | 0.18  |
| 38    | 25.142 | 3548025   |                                                                | 0.14  |
| 39    | 25.238 | 289978755 | Hexadecanoic acid, 2-hydroxy-, methyl ester                    | 11.51 |
| 40    | 25.481 | 390188035 | Methyl 3-hydroxytetradecanoate ?                               | 15.48 |
| 41    | 25.732 | 14477950  |                                                                | 0.57  |
| 42    | 25.824 | 6331957   | Ethane, 1,1,2,2-tetramethoxy-                                  | 0.25  |
| 43    | 25.884 | 8178309   | Tetradecanoic acid, methyl ester                               | 0.32  |
| 44    | 26.096 | 5207149   |                                                                | 0.21  |
| 45    | 26.992 | 2876159   | methyl 3-hydroxyhexadecanoate ?                                | 0.11  |
| 46    | 27.228 | 124276484 | Methyl palmitolenate, C16:1 (cis-9) Me ester                   | 4.93  |
| 47    | 27.354 | 95075856  | Hexadecanoic acid, methyl ester                                | 3.77  |
| 48    | 28.161 | 4230986   | Methyl 2-ethylhexyl phthalate                                  | 0.17  |
| 49    | 28.282 | 15418871  | Octadecanoic acid, 10-hydroxy-, methyl ester                   | 0.61  |
| 50    | 28.581 | 32785234  | methyl elaidate, C18:1 (trans-9) Me ester                      | 1.30  |
| 51    | 28.692 | 3379566   | Octadecanoic acid, methyl ester                                | 0.13  |

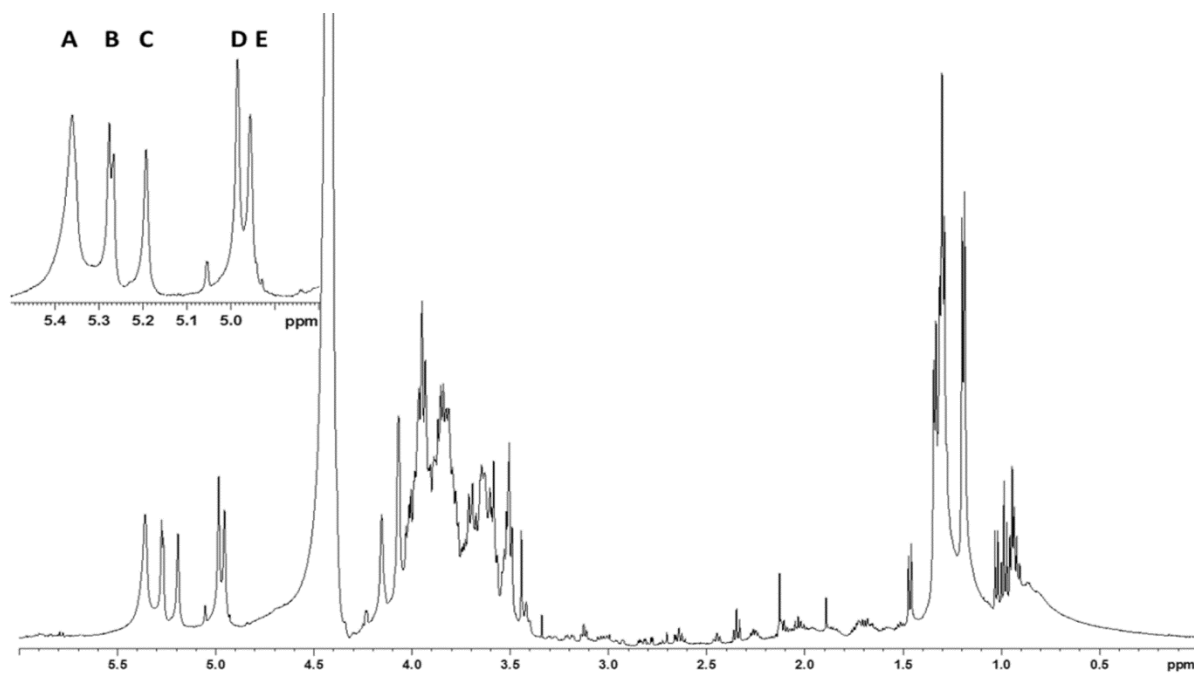

57

58 Fig. S3

59

60

61

62

63

64

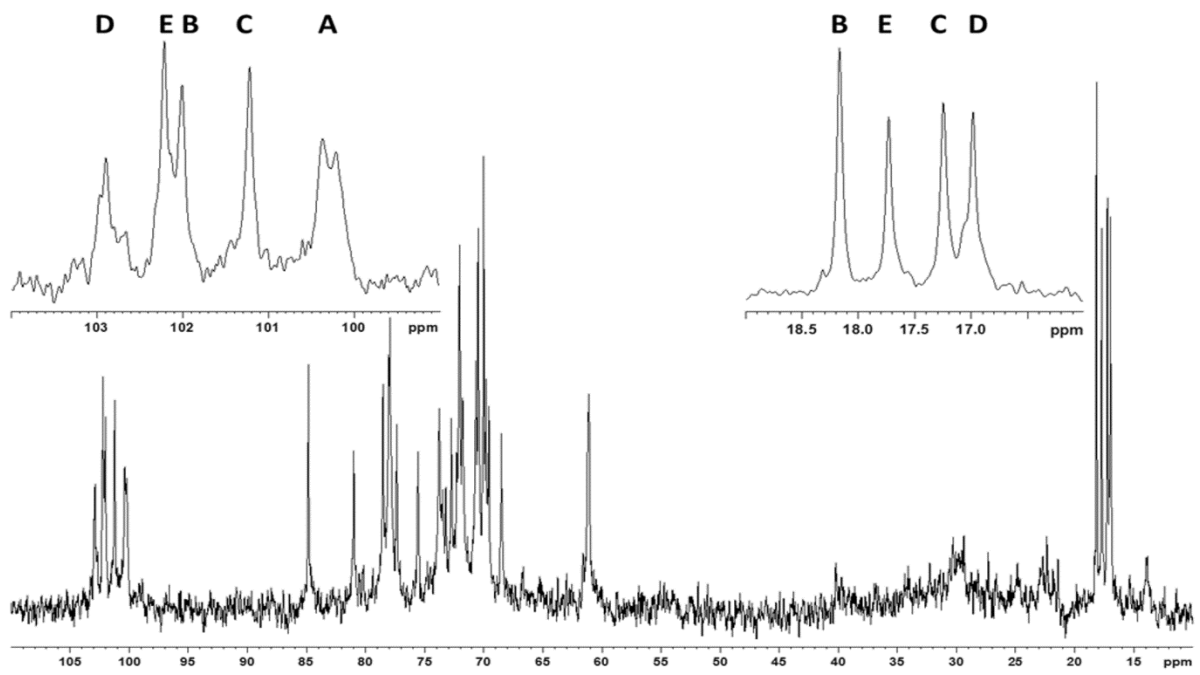

65

66 Fig. S4

67

68

69

70

71

72

73

74

75

76

77

78

79

80

81

82

83

84  
85  
86  
87  
88  
89  
90  
91  
92  
93  
94  
95  
96  
97  
98  
99  
100  
101  
102  
103  
104  
105  
106  
107  
108  
109  
110  
111

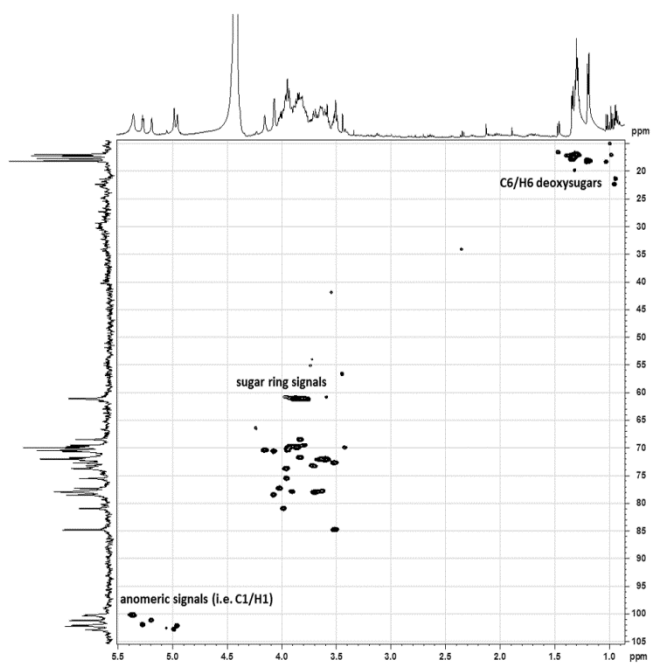

Fig. S5

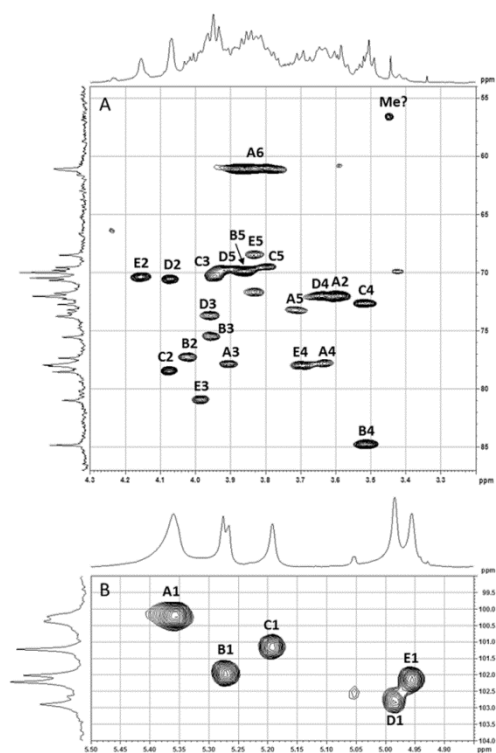

Fig. S6

112  
113  
114  
115  
116  
117  
118  
119  
120  
121  
122  
123  
124  
125  
126  
127  
128  
129  
130  
131  
132  
133  
134  
135  
136  
137  
138  
139

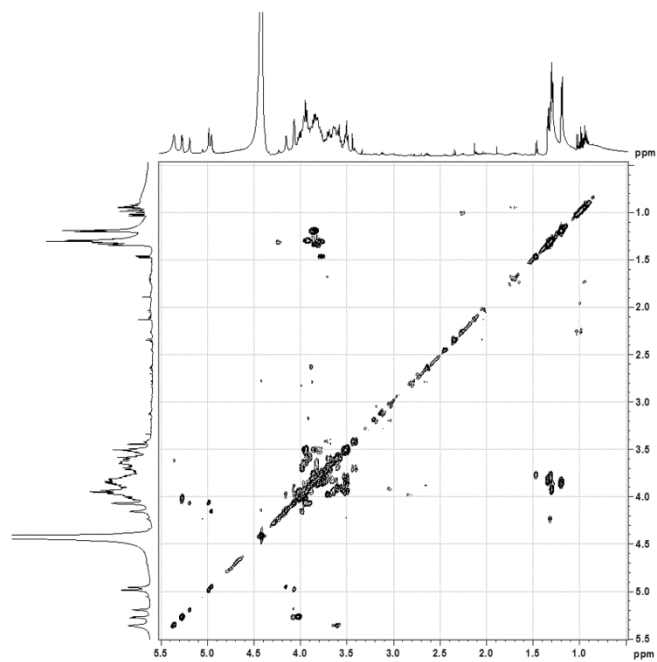

Fig. S7

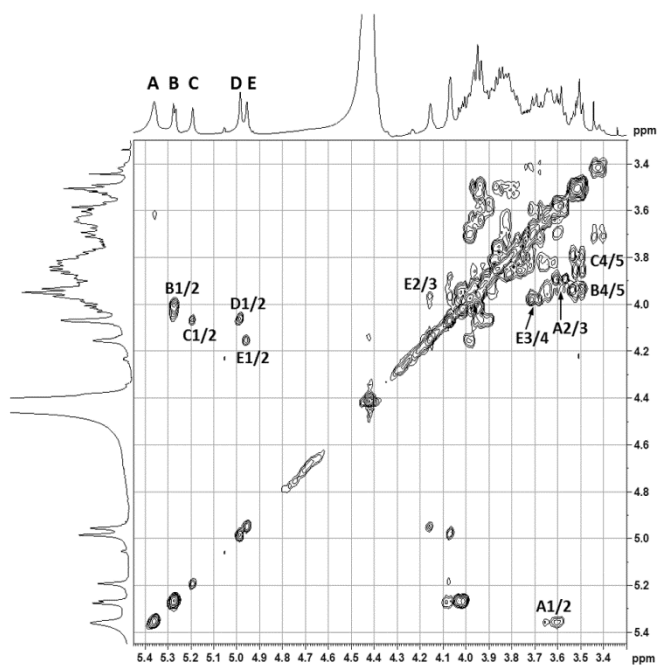

Fig. S8

**TABLE S1**  $^1\text{H}$ -NMR and  $^{13}\text{C}$ -NMR of the EPS composition

| Sugar residue                                          | Nucleus         | Chemical shift of proton and carbon (ppm) |      |                   |                   |      |                   |
|--------------------------------------------------------|-----------------|-------------------------------------------|------|-------------------|-------------------|------|-------------------|
|                                                        |                 | 1                                         | 2    | 3                 | 4                 | 5    | 6                 |
| $\rightarrow 4$ )- $\alpha$ -D-Glcp-(1 $\rightarrow$   | $^1\text{H}$    | 5.36                                      | 3.60 | 3.91 <sup>b</sup> | 3.63 <sup>b</sup> | 3.72 | 3.87/3.81         |
|                                                        | $^{13}\text{C}$ | 100.4                                     | 72.1 | 77.9 <sup>b</sup> | 77.7 <sup>b</sup> | 73.2 | 61.1              |
| $\alpha$ -D-Fucf-(1 $\rightarrow$                      | $^1\text{H}$    | 5.27                                      | 4.02 | 3.95 <sup>d</sup> | 3.51              | 3.86 | 1.20              |
|                                                        | $^{13}\text{C}$ | 102.0                                     | 77.3 | 75.6 <sup>d</sup> | 84.8              | 69.9 | 18.1              |
| $\rightarrow 2$ )- $\alpha$ -D-Rhap-(1 $\rightarrow$   | $^1\text{H}$    | 5.20                                      | 4.07 | 3.94 <sup>b</sup> | 3.52 <sup>b</sup> | 3.79 | 1.31 <sup>c</sup> |
|                                                        | $^{13}\text{C}$ | 101.2                                     | 78.5 | 70.3 <sup>b</sup> | 72.7 <sup>b</sup> | 69.5 | 17.1 <sup>c</sup> |
| $\rightarrow 3$ )- $\alpha$ -D-Rhap-(1 $\rightarrow$   | $^1\text{H}$    | 4.99                                      | 4.06 | 3.95 <sup>d</sup> | 3.64 <sup>b</sup> | 3.92 | 1.30 <sup>c</sup> |
|                                                        | $^{13}\text{C}$ | 102.9                                     | 70.6 | 73.7 <sup>d</sup> | 72.0 <sup>b</sup> | 69.8 | 17.0 <sup>c</sup> |
| $\rightarrow 3,4$ )- $\alpha$ -D-Rhap-(1 $\rightarrow$ | $^1\text{H}$    | 4.96                                      | 4.16 | 3.99              | 3.69              | 3.83 | 1.34              |
|                                                        | $^{13}\text{C}$ | 102.2                                     | 70.4 | 80.9              | 77.9              | 68.5 | 17.6              |

<sup>b</sup> assignments are only tentative<sup>c, d</sup> assignments are interchangeable
